# Supplementary material
Source: publisher figshare collection journal article supplement (https://sage.figshare.com/ndownloader/files/24120403)
Supplement: Supplementary file 1 [file 24120403]

**Figure 1.** The cytotoxicity of BPA on RWPE-1 cells. **(A)** The concentration gradient from 0.01 μM to 1000 μM for 24 h was used to detect the IC50 of BPA to RWPE-1 cells. **(B)** Cell viability of RWPE-1 cells after incubation with 20 μM BPA for 12 h, 24 h, 48 h, 72 h and 96 h, respectively.

**Figure 2.** BPA promoted colony formation, migration and invasion of RWPE-1 cells. **(A)** The ability of colony formation of RWPE-1 cells was detected by soft agar assay after 7 weeks with BPA. **(B)** The colony number was counted and analyzed by AVONA. ****P*< 0.001, ***P*< 0.01 compared with DMSO group. **(C)** The wound healing assay was used to evaluate the migration in 20 μM BPA-transformed cells after 0 h, 12 h, 24 h, and 48 h. **(D)** Quantified width was measured by software (Image-pro plus) for analysis. ***P* < 0.01,**P*< 0.05 compared with DMSO group. **(E)** Transwell invasion assay was utilized to further explain the invasion of the BPA-transformed RWPE-1 cells under the microscope. **(F)** The numbers of invasion cells were counted. ****P*< 0.001 compared with DMSO group.

**Figure 3. (A)** The protein expression of CFTR in transformed RWPE-1 cells (*P* <0.05). **(B)** The expression of CFTR in 20 μM BPA-transformed RWPE-1 cells was measured by western blot with β-actin as the internal control. The bands were quantified and each column represents the average of three samples. ****P* < 0.001 compared with DMSO group.

**Figure 4.** ATP level was detected by the ELISA kit in the samples. ****P* < 0.001 compared with DMSO group.

**Figure 5. (A)** The expression of Bcl-2 and Bax in transformed RWPE-1 cells incubated with 20 μM BPA for 24 hours. **(B)** The expression levels of Bcl-2 and Bax of 20 μM BPA-transformed RWPE-1 cells were measured by western blot with β-actin as the internal control. The bands were quantified and each column represents the average of three samples. ****P* <0.001 compared with DMSO group. **P* < 0.05 compared with DMSO group.

**Figure 6.** Flow cytometry analysis for the apoptosis of RWPE-1 cells after incubation with 20 μM BPA for 48 h.
